# Supplementary material for: One-pot synthesis of hydrophilic CuInS2 and CuInS2–ZnS colloidal quantum dots
Source: Royal Society of Chemistry journal article supplement (doi:10.1039/c3tc32564d), 2014-01-01
Supplement: c3tc32564d1.pdf [file c3tc32564d1.pdf]

Supporting Information

# One-Pot Synthesis of Hydrophilic CuInS<sub>2</sub> and CuInS<sub>2</sub>/ZnS Colloidal Quantum Dots

Jianbing ZHANG,<sup>a, b</sup> Weipeng SUN,<sup>a</sup> Liping YIN,<sup>a</sup> Xiangshui MIAO<sup>a, b</sup> and Daoli ZHANG,<sup>a, b, \*</sup>

<sup>a</sup> School of Optical and Electronic Information, Huazhong University of Science and Technology, No. 1037 Luoyu Road, Hongshan District, Wuhan City, Hubei Province, 430074, P. R. China. Electronic mail: zhang\_daoli@hust.edu.cn

<sup>b</sup> Wuhan National Laboratory for Optoelectronics, 1037 Luoyu Road, Hongshan District, Wuhan City, Hubei Province, 430074, P. R. China

TITLE RUNNING HEAD: A Green Synthesis of Hydrophilic CuInS<sub>2</sub> Quantum dots

\*Corresponding author: zhang\_daoli@hust.edu.cn

**Synthesis of hydrophilic CdS and ZnS nanocrystals.** The synthetic method is the same with the case of CuInS<sub>2</sub> quantum dots with the cation precursors were replaced by Cd(Ac)<sub>2</sub>·2H<sub>2</sub>O and Zn(Ac)<sub>2</sub>·2H<sub>2</sub>O respectively.

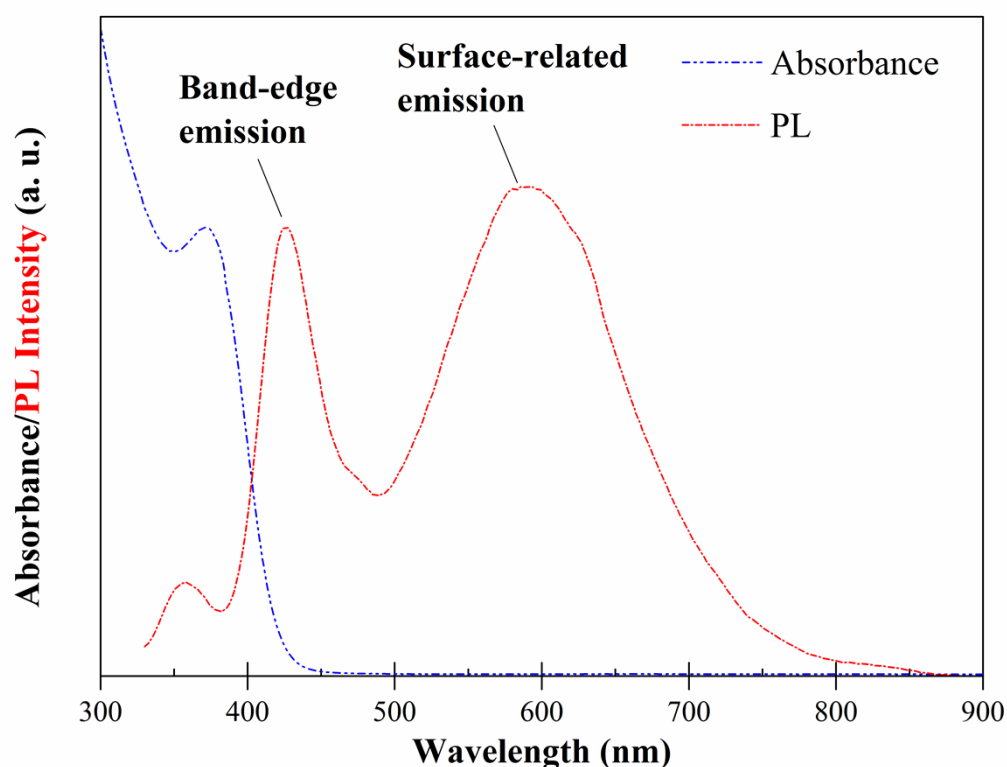

Figure S1. The absorption and photoluminescence spectra of CdS colloidal quantum dots. (The remarkable surface-related emission is due to poor surface-capping.)

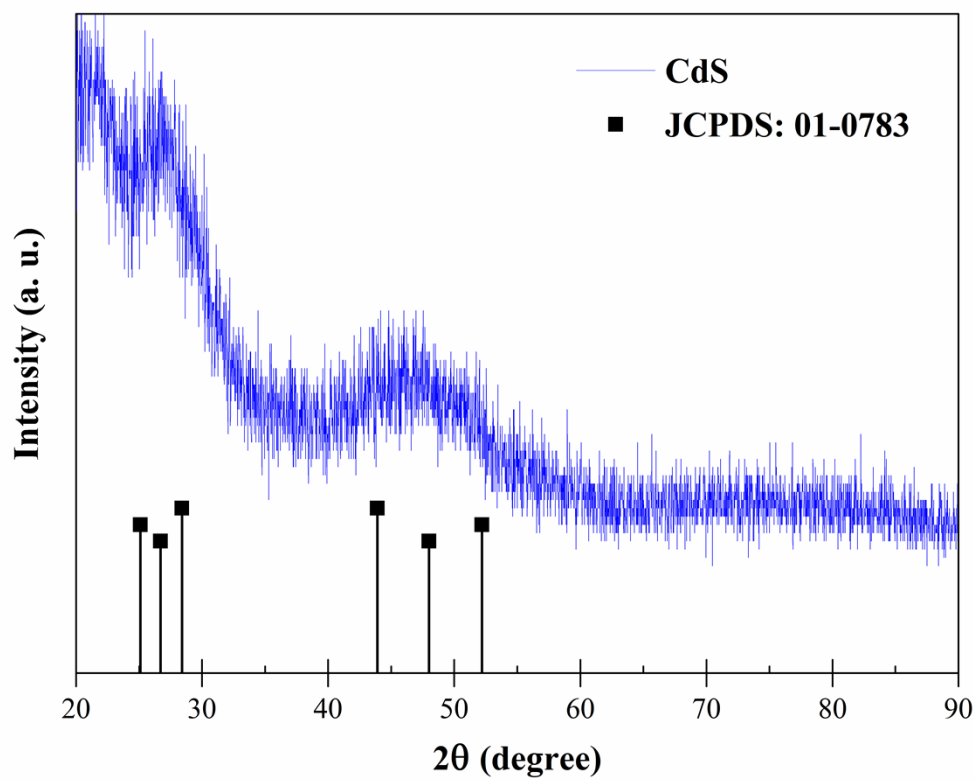

Figure S2. XRD pattern of CdS colloidal quantum dots.

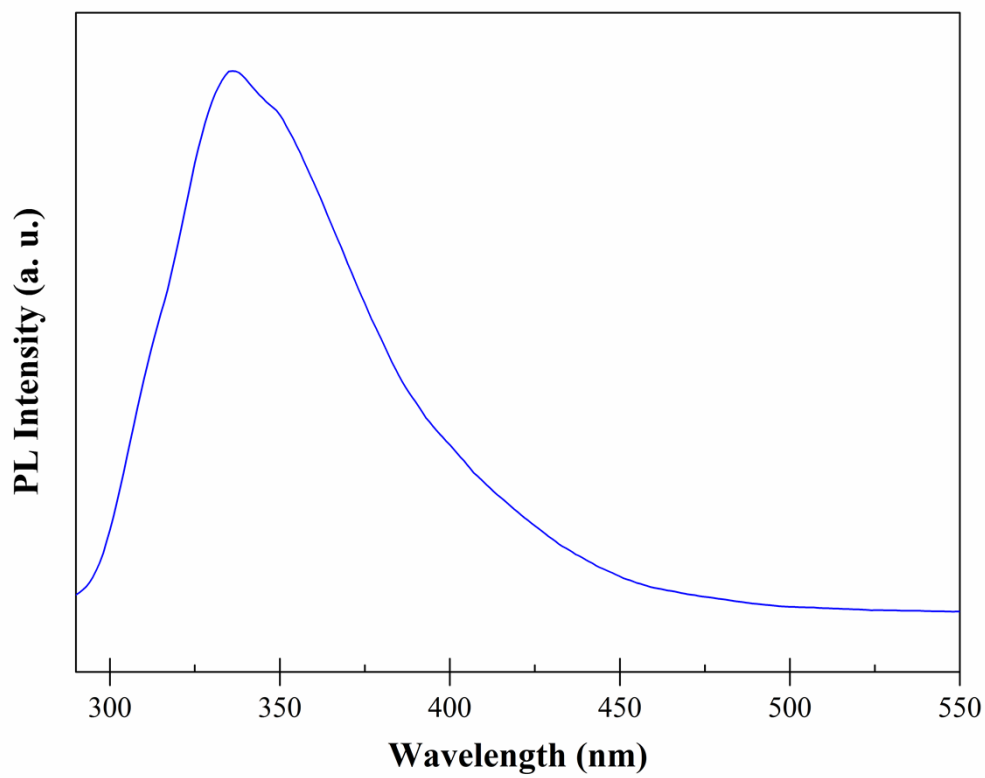

Figure S3. The photoluminescence spectrum of ZnS colloidal quantum dots.

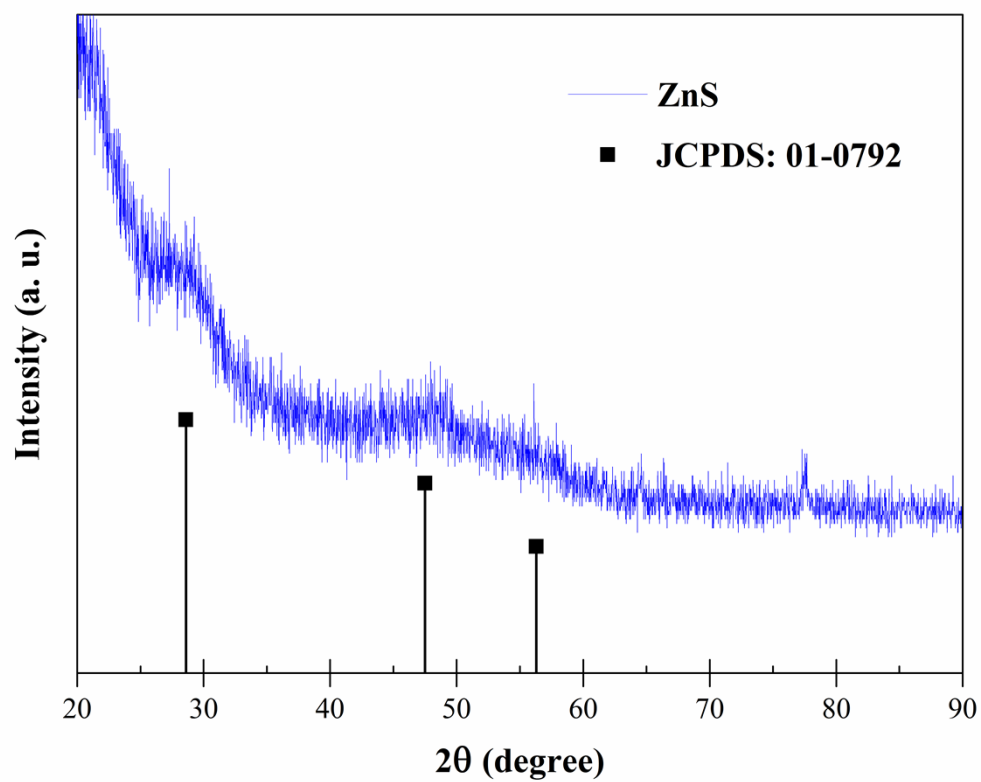

Figure S4. XRD pattern of ZnS colloidal quantum dots.
